# Supplementary material
Source: PubMed Central journal article supplement (PMC6902199)
Supplement: jamaotolaryngolheadnecksurg-146-113-s001.pdf [file jamaotolaryngolheadnecksurg-146-113-s001.pdf]

## Supplementary Online Content

le Clercq CMP, Lauschagne LJE, Franken M-CJP, Baatenburg de Jong RJ, Luijk MPCM, Jansen PW, van der Schroeff MP. Association of slight to mild hearing loss with behavioral problems and school performance in children. *JAMA Otolaryngol Head Neck Surg*. Published online November 27, 2019. doi:10.1001/jamaoto.2019.3585

**eTable 1.** Differences between included (n=4779) and excluded (n=589) participants

**eTable 2.** Cito test scores and corresponding advice for secondary educational level.

**eTable 3.** The association of child hearing acuity with standardized behavioral problem scores, in boys (n = 2200) and girls (n = 2271)

This supplementary material has been provided by the authors to give readers additional information about their work.

**eTable 1. Differences between included (n = 4779) and excluded (n = 589) participants**

|                                             | Included participants | Excluded participants | P-value of the difference |
|---------------------------------------------|-----------------------|-----------------------|---------------------------|
| N                                           | 4779                  | 589                   |                           |
| <i>Sociodemographic</i>                     |                       |                       |                           |
| Age, median (IQR)                           | 9.7 (9.6-9.9)         | 9.8 (9.7-10.0)        | < 0.001                   |
| Sex, n (%)                                  |                       |                       |                           |
| Male                                        | 2358 (49.3)           | 291 (49.4)            | 0.976                     |
| Female                                      | 2421 (50.7)           | 298 (50.6)            |                           |
| Ethnicity, n (%)                            |                       |                       |                           |
| Western                                     | 3418 (71.5)           | 224 (38.0)            | < 0.001                   |
| Non-Western                                 | 1286 (26.9)           | 317 (53.8)            |                           |
| Missing                                     | 75 (1.6)              | 48 (8.1)              |                           |
| Gestational age at birth (weeks), mean (SD) | 39.8 (1.9)            | 39.8 (1.8)            | 0.848                     |
| Birth weight (g), mean (SD)                 | 3514.9 (577.5)        | 3369.6 (569.6)        | 0.069                     |
| Maternal educational level, n (%)           |                       |                       |                           |
| No or primary education                     | 104 (2.2)             | 44 (7.5)              | < 0.001                   |
| Secondary education                         | 1547 (32.4)           | 167 (28.4)            |                           |
| Higher education                            | 2624 (54.9)           | 124 (21.1)            |                           |
| Missing                                     | 504 (10.5)            | 254 (43.1)            |                           |
| Household income, n (%)                     |                       |                       |                           |
| Lowest tertile                              | 1040 (21.8)           | 167 (28.4)            | < 0.001                   |
| Middle tertile                              | 1530 (32.0)           | 84 (14.3)             |                           |
| Highest tertile                             | 1500 (31.4)           | 59 (10.0)             |                           |
| Missing                                     | 709 (14.8)            | 279 (47.4)            |                           |
| <i>Hearing acuity</i>                       |                       |                       |                           |
| Better ear LPTA (dB HL), mean (SD)          | 6.5 (4.7)             | 7.5 (6.4)             | < 0.001                   |
| Better ear HPTA (dB HL), mean (SD)          | 6.6 (4.9)             | 7.3 (7.3)             | 0.025                     |
| Worse ear LPTA (dB HL), mean (SD)           | 9.2 (5.9)             | 10.6 (7.3)            | < 0.001                   |
| Worse ear HPTA (dB HL), mean (SD)           | 9.9 (6.3)             | 11.0 (8.5)            | 0.001                     |
| SRT (dB SNR), mean (SD)                     | -5.7 (1.5)            | -5.5 (1.6)            | 0.006                     |

**eTable 2. Cito Test scores and corresponding advice for secondary educational level<sup>17</sup>.**

| Cito Test score | Advised secondary educational level                                                                      |
|-----------------|----------------------------------------------------------------------------------------------------------|
| 501-522         | VMBO_B/VMBO_L (preparing for labour market/very low level of vocational education)                       |
| 523-528         | VMBO_K (preparing for labour market/low level of vocational education)                                   |
| 529-532         | VMBO_G/VMBO_T (preparing for moderate-high levels of vocational education)                               |
| 533-536         | VMBO/HAVO (Combination class preparing for high level vocational education and senior general education) |
| 537-540         | HAVO (preparing for senior general education)                                                            |
| 541-544         | HAVO/VWO (Combination class preparing for senior general education and pre-university education)         |
| 545-550         | VWO (pre-university education)                                                                           |

<sup>17</sup> Cito. Betekenis van de standaardscore op de Citotoets [Meaning of the standard scores of the Cito Test]. [www.cito.nl](http://www.cito.nl). Published 2014. Accessed 17 April, 2018.

**eTable 3. The association of child hearing acuity with standardized behavioral problem scores, in boys (n = 2200) and girls (n = 2271)<sup>a</sup>.**

|                             | CBCL problem Z-scores       |                             |
|-----------------------------|-----------------------------|-----------------------------|
|                             | Boys                        | Girls                       |
|                             | β (95% CI)                  | β (95% CI)                  |
| Total problem score         |                             |                             |
| Better ear LPTA             | <b>0.010 (0.001, 0.018)</b> | -0.003 (-0.011, 0.005)      |
| Better ear HPTA             | 0.004 (-0.004, 0.012)       | -0.005 (-0.013, 0.003)      |
| Worse ear LPTA              | 0.006 (-0.001, 0.013)       | 0.001 (-0.005, 0.007)       |
| Worse ear HPTA              | 0.004 (-0.002, 0.011)       | -0.001 (-0.007, 0.004)      |
| SRT <sup>b</sup>            | -0.016 (-0.052, 0.019)      | 0.014 (-0.021, 0.050)       |
| Internalizing problem score |                             |                             |
| Better ear LPTA             | 0.005 (-0.004, 0.014)       | -0.004 (-0.012, 0.004)      |
| Better ear HPTA             | 0.001 (-0.008, 0.009)       | -0.008 (-0.016, 0.000)      |
| Worse ear LPTA              | 0.004 (-0.004, 0.011)       | -0.001 (-0.007, 0.006)      |
| Worse ear HPTA              | 0.003 (-0.004, 0.010)       | -0.004 (-0.010, 0.002)      |
| SRT <sup>b</sup>            | -0.014 (-0.049, 0.021)      | -0.018 (-0.054, 0.019)      |
| Externalizing problem score |                             |                             |
| Better ear LPTA             | 0.004 (-0.005, 0.013)       | -0.007 (-0.015, 0.001)      |
| Better ear HPTA             | 0.000 (-0.008, 0.009)       | -0.004 (-0.012, 0.004)      |
| Worse ear LPTA              | 0.001 (-0.006, 0.009)       | -0.002 (-0.008, 0.005)      |
| Worse ear HPTA              | 0.000 (-0.007, 0.006)       | -0.002 (-0.008, 0.004)      |
| SRT <sup>b</sup>            | 0.002 (-0.036, 0.039)       | 0.007 (-0.029, 0.043)       |
| Social problem score        |                             |                             |
| Better ear LPTA             | 0.008 (0.000, 0.017)        | -0.001 (-0.009, 0.007)      |
| Better ear HPTA             | 0.004 (-0.004, 0.013)       | -0.002 (-0.011, 0.006)      |
| Worse ear LPTA              | <b>0.010 (0.002, 0.017)</b> | 0.002 (-0.004, 0.008)       |
| Worse ear HPTA              | 0.004 (-0.003, 0.011)       | 0.000 (-0.006, 0.006)       |
| SRT <sup>b</sup>            | -0.028 (-0.064, 0.008)      | 0.025 (-0.012, 0.062)       |
| Attention problem score     |                             |                             |
| Better ear LPTA             | <b>0.012 (0.003, 0.020)</b> | -0.002 (-0.011, 0.006)      |
| Better ear HPTA             | 0.007 (-0.001, 0.015)       | -0.002 (-0.010, 0.007)      |
| Worse ear LPTA              | <b>0.009 (0.002, 0.016)</b> | 0.003 (-0.003, 0.010)       |
| Worse ear HPTA              | 0.004 (-0.003, 0.010)       | 0.003 (-0.003, 0.009)       |
| SRT <sup>b</sup>            | 0.010 (-0.027, 0.046)       | <b>0.039 (0.002, 0.076)</b> |

<sup>a</sup> Analyses adjusted for age, gestational age at birth, ethnicity, maternal educational level, household income, and maternal and paternal psychopathology

<sup>b</sup> Data available for n = 1228 boys, and for n = 1260 girls.
